# Supplementary material for: A novel water-soluble fluorescent probe with ultra-sensitivity over a wider pH range and its application for differentiating cancer cells from normal cells
Source: Royal Society of Chemistry journal article supplement (doi:10.1039/c9an01504c), 2019-01-01
Supplement: c9an01504c1.pdf [file c9an01504c1.pdf]

## Supporting Information

### **A novel water-soluble fluorescent probe with ultra-sensitivity over a wider pH range and its application for differentiating cancer cells from normal cells**

Zilu Li,<sup>a</sup> Chen Yu,<sup>a</sup> Yanan Chen,<sup>a</sup> Zihan Zhuang,<sup>a</sup> Bin Tian,<sup>b</sup> Caiyun Liu,<sup>a\*</sup> Pan Jia,<sup>a</sup>  
Hanchuang Zhu,<sup>a</sup> Wenlong Sheng,<sup>b\*</sup> and Baocun Zhu<sup>a\*</sup>

<sup>a</sup> School of Water Conservancy and Environment, University of Jinan, Shandong Provincial Engineering Technology Research Center for Ecological Carbon Sink and Capture Utilization, Jinan 250022, P. R. China.

<sup>b</sup> Qilu University of Technology (Shandong Academy of Sciences), Biology Institute of Shandong Academy of Sciences, 19 Keyuan Road, Lixia District, Jinan, 250014, Shandong Province, P. R. China.

E-mail address: lcyzbc@163.com (B. Zhu), liucaiyun1982072@163.com, and 15618694162@163.com (W. Sheng)

---

## Table of Contents

1. Materials and instruments
2. Calculation of the  $pK_a$  and  $K_a$
3. Absorption spectra of different concentrations probe **pH-DCN** in aqueous solution
4. Determination of quantum yield
5. Cytotoxicity assays
6. Imaging studies of live cells
7. The  $^1H$ -NMR and  $^{13}C$ -NMR data of probe **pH-DCN**
8. Additional table of comparison between reported pH probes and **pH-DCN**
9. References

## 1. Materials and instruments

Except for special labels, chemical reagents were obtained from commercial vendor (Shanghai Civic Chemical Technology Co., Ltd.) and employed without further purification. High resolution mass spectra (HRMS) were obtained by LC-MS2010A instrument (the supplier from Shimadzu, Japan).  $^1\text{H}$  and  $^{13}\text{C}$  NMR data were obtained by Bruker AV-400 NMR spectrometer (the supplier from Shimadzu, Japan). Absorption spectra were obtained by UV-3101PC spectrophotometer (the supplier from Shimadzu, Japan). Fluorescence spectra were obtained by Horiba FluoroMax-4 spectrophotometer (the supplier from HORIBA Scientific, America). Fluorescence imaging of pH in live cells was carried out on an Olympus FV1000-IX81 confocal fluorescence microscope (the supplier from Olympus Corporation, Japan).

## 2. Calculation of the $\text{pK}_a$ and $\text{K}_a$

According to the Henderson-Hasselbach-type mass action equation ( $\log [(F_{\text{max}} - F)/(F - F_{\text{min}})] = \text{pK}_a - \text{pH}$ , where  $F$  is the fluorescence emission intensity at 530 nm), we calculated that the  $\text{pK}_a$  of the probe is 8.976, and the  $\text{K}_a$  of probe **pH-DCN** is  $1.06 \times 10^{-9}$ .

## 3. Absorption spectra of different concentrations probe pH-DCN in aqueous solution

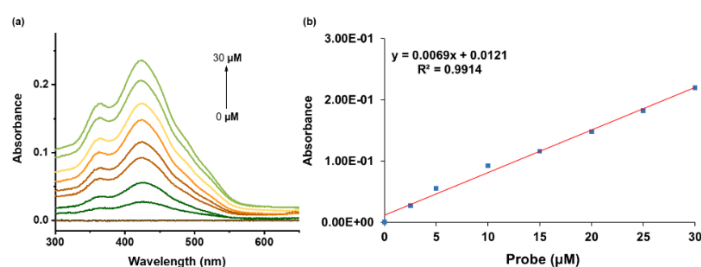

---

**Figure S1** (a) The absorption spectra of different concentrations probe **pH-DCN** (0-30  $\mu\text{M}$ ) in the PBS solution (10 mM, pH = 4). (b) The absorbances of different concentrations probe **pH-DCN** as a function of probe concentrations (0-30  $\mu\text{M}$ ).

#### 4. Determination of quantum yield

The  $\Phi_{\text{pH}=4}$  (probe **pH-DCN** at pH value was 4) and  $\Phi_{\text{pH}=12}$  (probe **pH-DCN** at pH value was 12) were determined in aqueous solution with optically matching solutions of fluorescein ( $\Phi = 0.95$  in 0.1 M NaOH solution)<sup>1</sup> as the standard and the quantum yield was calculated using the following equation:

$$\Phi_s = \Phi_r (A_r F_s / A_s F_r) (n_s^2 / n_r^2)^2$$

Where, s and r denote sample and reference, respectively.  $A$  is the absorbance.  $F$  is the relative integrated fluorescence intensity and  $n$  is the refractive index of the solvent,  $\Phi_{\text{pH}=4}$  was calculated as 0.0018,  $\Phi_{\text{pH}=12}$  was calculated as 0.236.

#### 5. Cytotoxicity assays

The cell viability of RAW 264.7 macrophage cells, treated with probe **pH-DCN**, was assessed by a cell counting kit-8 (CCK-8; Dojindo Molecular Technologies, Tokyo, Japan). Briefly, RAW 264.7 macrophage cells, seeded at a density of  $1 \times 10^6$  cells  $\text{mL}^{-1}$  on a 96-well plate, were maintained at 37  $^{\circ}\text{C}$  in a 5%  $\text{CO}_2$  / 95% air incubator for 12 h. Then the live RAW 264.7 macrophage cells were incubated with various concentrations (0, 5, 10, 20, and 30  $\mu\text{M}$ ) of probe **pH-DCN** suspended in culture medium for 8 h. Subsequently, CCK-8 solution was added into each well for 2 h, and absorbance at 450 nm was measured.

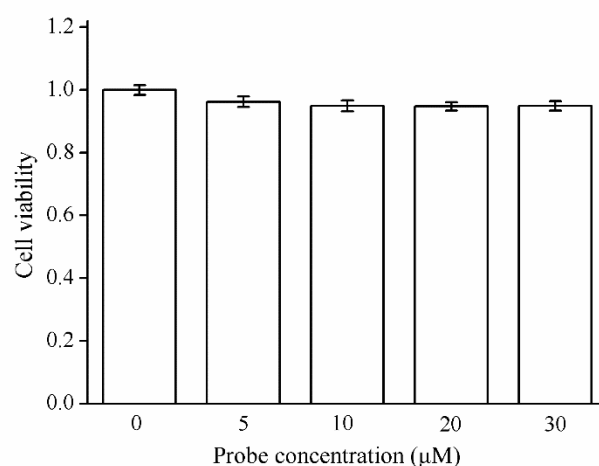

**Figure S2** Cytotoxicity assays of probe **pH-DCN** at different concentrations for RAW 264.7 macrophage cells

## 6. Imaging studies of live cells

The RAW 264.7, HEK293, HUVEC, MGC-803, A549, HeLa and PC12 cells were cultured in Dulbecco's modified Eagle's medium (DMEM) and incubated under an atmosphere containing 5% CO<sub>2</sub> at 37 °C humidified air for 24 h. DMEM contains 10% fetal bovine serum and 1% penicillin–streptomycin. Cells were seeded on dish for fluorescence microscopic imaging by laser confocal fluorescence microscope. The cells were incubated with the probe **pH-DCN** (10 µM) for 30 minutes, the cells were rinsed three times with potassium rich PBS at different pH values of 6.0 and 7.4. The cells were incubated further with nigericin (10 µM) for 30 minutes, and after the confocal cell imaging was conducted. Then the fluorescence imaging of cells was carried out by confocal fluorescence microscope. And HEK293, HUVEC, MGC-803, A549, HeLa and PC12 cells were incubated with probe **pH-DCN** (10 µM) for 60 min, finally the fluorescence imaging of cells was carried out by confocal fluorescence microscope.

## 7. The $^1\text{H}$ -NMR and $^{13}\text{C}$ -NMR data of probe pH-DCN

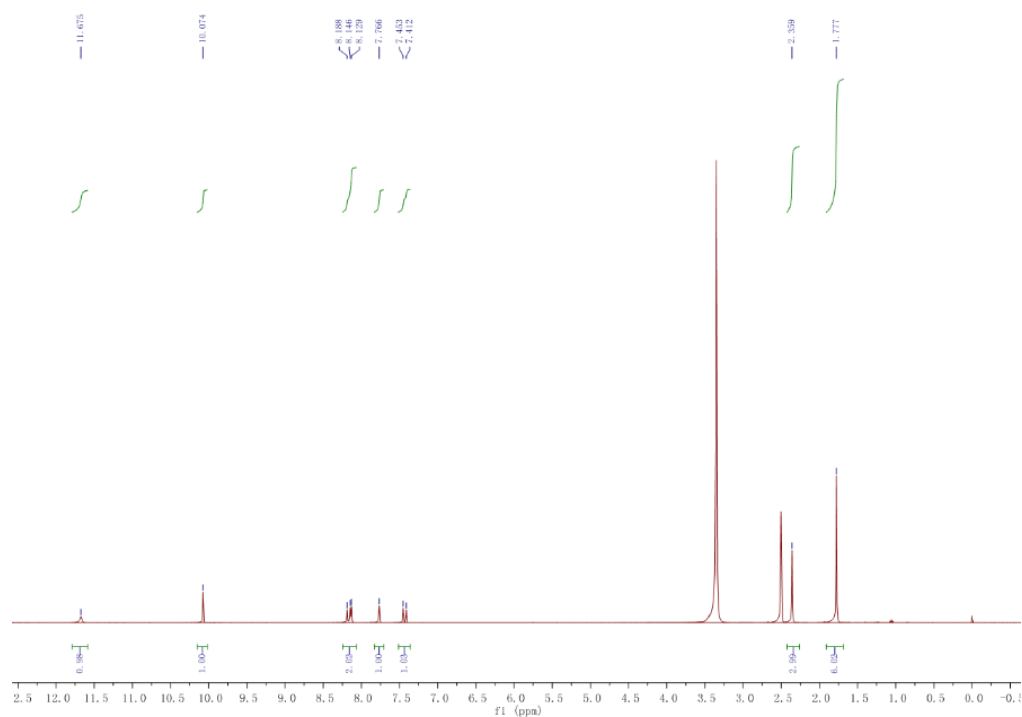

Figure S3  $^1\text{H}$ -NMR data of probe pH-DCN

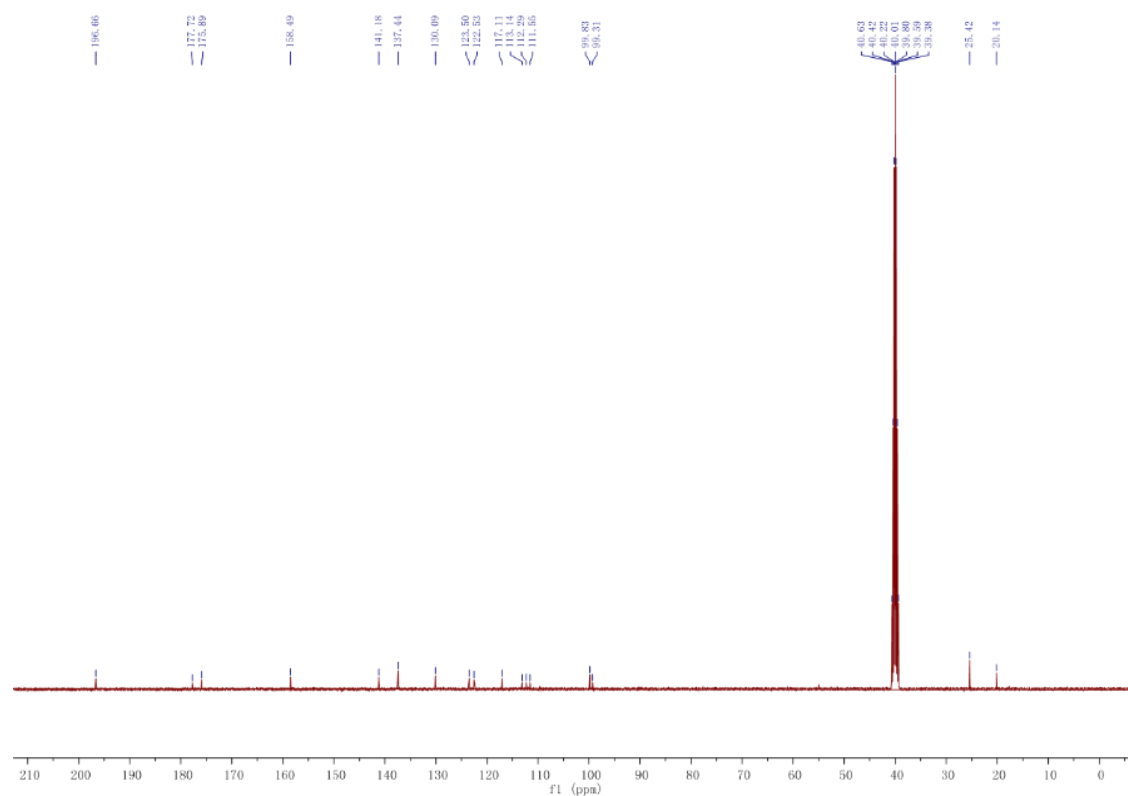

Figure S4  $^{13}\text{C}$ -NMR data of probe pH-DCN

## 8. Additional table of comparison between reported pH probes and pH-DCN

**Table S1** Comparison of fluorescent probes for pH

| Probe                                                                               | $\lambda_{em}$ | Solvent (v: v)                                | pH range | Distinguish cancer cells | Ref                                          |
|-------------------------------------------------------------------------------------|----------------|-----------------------------------------------|----------|--------------------------|----------------------------------------------|
| 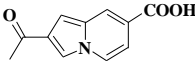   | 458            | DMSO/H <sub>2</sub> O<br>(2: 8)               | 2.4–8.0  | no                       | Sensors and Actuators: B<br>247 (2017) 46–52 |
|     | 475/605        | EtOH/H <sub>2</sub> O<br>(4: 6)               | 4.5–8.5  | no                       | ACS Sens.<br>2 (2017) 436–442                |
|    | 560/613        | CH <sub>3</sub> CN/H <sub>2</sub> O<br>(3: 7) | 2–9      | no                       | Anal. Chem.<br>89 (2017) 7038–7045           |
|  | 528            | DMSO/H <sub>2</sub> O<br>(1: 9)               | 2.5–9.5  | no                       | Sens. Actuators B<br>273 (2018) 1754–1761    |
|  | 454/514        | DMSO/H <sub>2</sub> O<br>(1: 4)               | 2.5–6.8  | no                       | Sens. Actuators B<br>262 (2018) 913–921      |

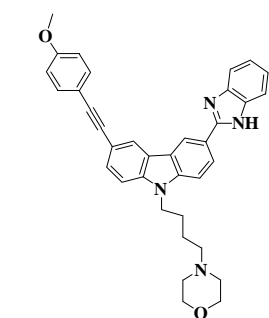

410/475

DMSO/H<sub>2</sub>O

(3: 7)

3.2–9.6

no

Chem. Commun.  
55 (2019) 1782–1785

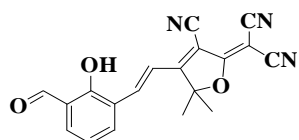

530

Aqueous solution

4–12

yes

This work

## 9. References

- 1 T.-B. Ren, W. Xu, Q. -L. Zhang, X. -X. Zhang, S. -Y. Wen, H. -B. Yi, L. Yuan and X.-B. Zhang, *Angew. Chem. Int. Ed.*, 2018, **57**, 7473-7477.
